# Supplementary material
Source: publisher site journal article supplement (https://www.spandidos-publications.com/4655/downloadSupplementary)
Supplement: Supplementary file 1 [file downloadSupplementary]

## Sheet: Sheet1
Table SV. Results of Gene Ontology cellular component analysis.
Category	Term	Count	%	P-value	Genes	List Total	Pop Hits	Pop Total	Fold Enrichment	Bonferroni	Benjamini	FDR
GOTERM_CC_DIRECT	GO:0005829~cytosol	1266	22.3992	1.63059e-38	USP6NL, NUP107, ITSN1, MYLK, ALKBH8, ZFYVE28, PSMD8, PREX1, LIPE, PSMD7, TDO2, TMEM88, PSMD2, DPYSL2, PSMD3, DPYSL3, ANKFY1, PSMD1, GTSE1, XYLB, GABARAPL2, MEF2C, CSNK2A1, STARD8, CSNK2A2, PHKA1, DICER1, PRKAB1, EML1, BCR, AR, MYL5, CH25H, RBP4, MYL7, MTHFD1, PRKAR1B, MTHFD2, DDIT3, MYL3, PSME4, DDIT4, PLBD1, TXNIP, PSME2, MYL9, SKAP1, IDO1, UNC119B, SLBP, SET, CDCA3, NCAPG, CDCA8, IQGAP2, MTMR4,…	5251	3315	18224	1.32541	1.93551e-35	1.0806e-35	1.03599e-35
GOTERM_CC_DIRECT	GO:0005654~nucleoplasm	1093	19.3383	1.82072e-38	MDC1, POP7, SLC4A1AP, PID1, NUP107, POP1, EHMT2, TSEN54, ALKBH8, PSMD8, ALKBH2, PSMD7, SCP2, PSMD2, PSMD3, PSMD1, GTSE1, MEF2A, WDHD1, MEF2C, SAP30BP, CSNK2A1, ZNF281, SECISBP2, CSNK2A2, DNTTIP1, RFX1, PRKAB1, RC3H2, AR, EID1, DDX39A, DDIT3, PSME2, UQCRC2, MPPE1, ATF5, CGGBP1, ATF4, SLBP, SET, CDCA2, PARPBP, CDCA7, COPS7B, CDCA8, GATA3, HSPH1, LARP1, MYO6, PPARGC1B, HEXIM2, CREBBP, JUN, NCAPH2, N…	5251	2784	18224	1.36255	2.1612e-35	1.0806e-35	1.03599e-35
GOTERM_CC_DIRECT	GO:0005737~cytoplasm	1824	32.2718	8.09453e-31	JRK, POP7, SLC4A1AP, SLA2, ALKBH6, FAM110A, SPIB, SCP2, RAVER1, DPYSL2, FAM110B, DPYSL3, MNX1, SDS, FRS2, RC3H2, ACE2, FEZ1, DDIT3, DDIT4, FEZ2, TXNIP, MPPE1, ATF5, SKAP1, ATF4, RABL6, EXD2, SLBP, URI1, CDCA2, SET, SHMT2, CDCA7, ZC3HAV1, PLA2G7, C12ORF57, EPB41L5, RNF213, LARP1, RDH10, AFMID, PDGFC, SFN, GSTM4, HEXIM2, CREBBP, GSTM2, FUCA1, EIF2AK1, EIF2AK2, LARP7, AIF1L, PKIB, AGO3, LAS1L, AGO1,…	5251	5222	18224	1.21224	9.60821e-28	3.20274e-28	3.07053e-28
GOTERM_CC_DIRECT	GO:0005634~nucleus	1799	31.8294	4.23318e-18	JRK, POP7, SLC4A1AP, ALKBH6, ALKBH8, SPIB, ALKBH2, RAVER1, MNX1, ZNF18, SAP30BP, PRKAB1, DDIT3, TXNIP, ATF5, SKAP1, ATF4, RABL6, EXD2, SLBP, URI1, SET, CDCA4, SHMT2, CDCA7, ZNF20, CDCA8, BAZ2B, GATA3, ZC3HAV1, ZNF26, RNF212, EPB41L5, RDH10, AFMID, PDGFC, SFN, HEXIM2, CREBBP, JUN, TEX30, TIPARP, PBX3, NR2F1, EIF2AK2, LARP7, PBX4, NR2F2, MAGOHB, NR2F6, PKIB, AGO1, AGO2, ZNF30, PYDC1, PKIG, NCAPG2, …	5251	5415	18224	1.15301	5.02479e-15	1.2562e-15	1.20434e-15
GOTERM_CC_DIRECT	GO:0016020~membrane	803	14.2074	2.44535e-17	NUP107, TFRC, ZFYVE1, PSMD7, SCP2, PSMD2, DPYSL2, PSMD3, ANKFY1, PSMD1, GTSE1, GSTK1, GBP5, HPCAL1, FRS2, SND1, RC3H2, BCR, SLC5A6, EML4, DDX39A, MTHFD1, ORAI3, ORAI1, PSME2, ABCB1, HPN, NCAPG, CYB5R1, RNF213, LARP1, RHOT1, MYO6, KCNMB4, RHBDL1, EDEM3, PRRT1, JAG1, ABCA3, LRBA, NCAPH2, EDEM2, EIF2AK2, LNPEP, SNF8, AGO3, LAS1L, AGO2, HYOU1, STRN, SFXN2, SFXN5, FERMT3, SRPX, PIGU, PIGT, PIGN, KCNC2…	5251	2200	18224	1.26676	2.90263e-14	5.80526e-15	5.56562e-15
GOTERM_CC_DIRECT	GO:0005739~mitochondrion	511	9.04105	5.35019e-15	OSGEPL1, GLDC, RPL34, ABAT, DCAF5, ELK1, ELK3, GCSH, COMTD1, GJA1, SCP2, MYC, ALKBH1, ZMIZ2, DPYSL2, FAM110B, CDK5RAP1, CKMT1B, VPS35, ACOT9, GSTK1, STARD3, ACOT8, ACOT7, SDS, STARD7, SECISBP2, PRKCE, GTPBP8, HOGA1, SND1, GTPBP3, HCFC1, ARMC1, MTHFD1, MTHFD2, CLPP, FEZ1, DDIT4, UQCRC2, PIF1, LIPT1, URI1, ABCB6, SHMT2, MRPL18, MRPL14, MRPL15, MRPL12, ADH5, PRDX3, CYB5R1, LDHB, PRDX5, PPP3R1, PRDX4…	5251	1331	18224	1.33243	6.32561e-12	1.05845e-12	1.01475e-12
GOTERM_CC_DIRECT	GO:0070062~extracellular exosome	981	17.3567	1.86099e-14	TFRC, ITSN1, MYLK, PSMD8, ISLR, PSMD7, SCP2, PSMD2, DPYSL2, PSMD3, ANKFY1, CKMT1B, PSMD1, XYLB, WLS, GSTK1, HPCAL1, PDZK1, HDHD2, SND1, SCAMP3, BCR, CLDN5, ACE2, RBP4, CLDN3, MTHFD1, SPARCL1, PSME2, UQCRC2, C5ORF46, TTYH3, ABCB1, ABCB6, SHMT2, HPN, TPRG1L, IQGAP2, C2, C3, CYB5R1, HPX, C5, HSPH1, C6, C7, PDGFD, FIGNL1, MYO6, PDGFC, SFN, LYN, GSTM2, FUCA1, CFAP70, FUCA2, PMM2, ERLIN2, SNF8, LYZ, CP…	5251	2811	18224	1.21118	2.21396e-11	3.1557e-12	3.02544e-12
GOTERM_CC_DIRECT	GO:0005730~nucleolus	349	6.17481	2.36472e-14	TCERG1, SMARCB1, RPL3, RPL34, GPATCH2, THYN1, MKI67, RPL8, PWP1, RPL9, TSEN54, SMC2, RRP9, RPS19, MYC, SKP2, RPS10, MNX1, RPS13, CDK5RAP3, ABT1, DDX17, DDX18, COG7, METTL1, MAP1S, IMP3, DDX11, CIRBP, DNTTIP1, WDR74, IMP4, GTPBP4, JMJD6, SUB1, GRWD1, CCDC86, TRIB3, L3MBTL1, PRKDC, SP140, NOLC1, CDCA8, XPC, GATA3, CDKN2AIP, ANAPC11, MTDH, NUAK1, CRACR2A, RNF213, MAP2, HLTF, GAR1, RRS1, DHX37, HMOX1…	5251	857	18224	1.41334	2.80699e-11	3.50865e-12	3.36381e-12
GOTERM_CC_DIRECT	GO:0043231~intracellular membrane-bounded organelle	222	3.92781	1.75872e-08	APP, AHCYL1, SLC4A1AP, TFRC, SLC35B1, ECI2, AQP9, PKD2L1, IFI30, ELK3, PREX1, NSDHL, SCP2, CHEK1, AGFG1, GSTK1, MEF2C, TIPIN, COG7, NSMCE1, TALDO1, RFX1, GTPBP2, SCAMP3, RUNX1, RUFY1, ABCA10, POR, RRAGA, ZFYVE16, RNF125, RRAGC, RRAGB, PPP1R3B, BTK, COL8A1, SPATA18, LLGL2, URI1, CASZ1, MGST2, UGT8, PRDX5, SNX1, RDH10, RDH16, RAB11FIP2, PUSL1, SNX8, RAB11FIP5, BARD1, CTSA, ABCA6, SIAH2, BRAF, PHC3,…	5251	558	18224	1.38077	2.08758e-05	2.31956e-06	2.2238e-06
GOTERM_CC_DIRECT	GO:0000776~kinetochore	48	0.849257	3.72791e-08	PHF2, SEH1L, NUP107, ANAPC16, ZWILCH, FBXO28, TTK, NUP160, WDR43, AURKB, MTBP, XPO1, SIN3A, NUP85, SUMO3, ZNF207, TRAPPC12, KAT8, NEK2, BUB1, CLASP2, CENPW, CBX5, SPAG5, DYNLT3, SS18L1, PLK1, LRWD1, KIF22, RANGAP1, CKAP5, KNSTRN, NDC80, ZWINT, SGO1, CENPE, KIF18A, CENPF, CENPH, INCENP, CENPI, ZW10, KIF2C, NUP98, MAD1L1, NUP37, MAD2L1, PAFAH1B1	5251	81	18224	2.05664	4.42494e-05	4.42503e-06	4.24237e-06
GOTERM_CC_DIRECT	GO:0005743~mitochondrial inner membrane	177	3.13163	2.72169e-07	MTCH1, MPV17L2, TOMM22, CHCHD3, CHCHD6, PDK4, CKMT1B, SLC25A43, PMPCA, SLC25A42, ACAD11, HADH, GSTK1, CPT1A, RSAD2, MCCC1, MRPS18A, SDHA, ATAD3A, ALDH3A2, AFG3L2, SPNS1, PPIF, VDAC2, VDAC1, UQCRC2, LETMD1, ABCB6, UQCRB, NDUFB11, SHMT2, MRPL18, MRPL16, MRPL17, MRPL14, OMA1, MRPL15, MRPL12, HIGD1A, MRPL13, UQCRH, ACAT1, MRPL11, PGS1, CYP11A1, LDHD, CYC1, SRGAP2, RHBDL3, NDUFV1, RHBDL1, COX10, TRAP1…	5251	441	18224	1.39295	0.000323012	2.93695e-05	2.81571e-05
GOTERM_CC_DIRECT	GO:0000502~proteasome complex	36	0.636943	1.69992e-06	PSMD12, VCP, PSMD11, UBE3C, PSMD14, PSMD13, ZFAND2A, UBE3A, PSMB10, PSMA7, PSMD8, PSMB6, PSMB7, PSMB4, PSMD7, PSMB5, PSMB2, PSMB3, PSMD2, PSMD3, PSMB1, UBQLN1, PSMD1, WFS1, ADRM1, RAD23A, PSMB9, PSMA5, PSMA6, PSMA3, PSMA4, PSMC3, PSMC2, PSME4, PSMG3, PSME2	5251	60	18224	2.08235	0.00201578	0.000168151	0.00016121
GOTERM_CC_DIRECT	GO:0005925~focal adhesion	156	2.76008	2.18041e-06	SCARB2, MDC1, RPL3, ARPC5L, DIXDC1, SLC4A2, RPL8, PVR, RPL9, ACTB, RPL6, GJA1, ALCAM, RPS19, CDH2, PLAU, PPFIA1, CAPN1, RPS10, RPS13, TNS2, TGM2, PDGFRB, RPS9, MAP2K1, MAP2K2, STARD8, RPL22, CASK, CYBA, ACTN4, PROCR, ADAM17, LAP3, PFN1, PPIA, PHLDB2, S100A7, FBLN7, GRB7, CD151, CD99L2, LPP, HSP90B1, CORO1C, SLC9A1, CNN3, ARHGAP22, EPB41L5, CNN1, GRK5, FLRT2, TSPAN9, FLRT3, TSPAN4, ATP6V0A2, FZD1,…	5251	391	18224	1.38468	0.00258481	0.000199089	0.00019087
GOTERM_CC_DIRECT	GO:0005874~microtubule	128	2.26469	3.10267e-06	TPGS2, TUBB8, RUSC1, TUBB3, KIF5C, DPYSL2, STMN1, NUSAP1, ZNF207, TEKT3, KIF21A, NEK2, KIF21B, SYBU, CDK5RAP3, DYNC2H1, GAS2L3, MAP2K2, MAP1S, MTUS1, MID1, EML1, MID2, TUBA4A, EML4, KIF16B, FEZ1, MAP1A, KIF20A, MACF1, IQGAP2, NDRG1, GABARAP, DYNC2LI1, KLC3, SPAST, HSPH1, KLC2, RACGAP1, MAP2, MAP6, KIF3C, DNAH12, NEK6, RCC2, DNAH14, TBCD, TBCC, RMDN1, CCT6A, TPX2, KIF18A, KIF18B, APPBP2, HOOK2, RE…	5251	311	18224	1.4284	0.0036761	0.000263062	0.000252202
GOTERM_CC_DIRECT	GO:0000777~condensed chromosome kinetochore	46	0.813871	5.62185e-06	DCTN6, PHF2, ERCC6L, SEH1L, NUP107, ANAPC16, ZWILCH, FBXO28, HJURP, NUP85, NUF2, ZNF207, KNTC1, NEK2, TP53BP1, BUB1, CLASP2, CENPW, CENPX, SPAG5, CSNK1A1, DYNLT3, SS18L1, LRWD1, KNL1, RANGAP1, CKAP5, KNSTRN, NDC80, ZWINT, SGO1, SGO2, CENPE, CENPH, INCENP, ZW10, CENPK, BIRC5, CENPM, CENPN, KIF2C, CENPO, MAD1L1, NUP37, MAD2L1, SPC25	5251	87	18224	1.83502	0.00665094	0.000444876	0.000426511
GOTERM_CC_DIRECT	GO:0030496~midbody	62	1.09696	6.40387e-06	CCDC124, KIF14, HEPACAM2, SLC2A1, TRIOBP, ZFYVE26, NEK2, TTC23L, CEP55, ANXA2, DDX11, ANXA11, KIF23, VPS37B, GEM, DNM2, ASPM, RAP2A, PSRC1, PITPNM1, INCENP, CHMP4C, BIRC5, CHMP4B, PKP4, KIF20A, RALA, RALB, CTDP1, ARL3, VPS4A, RNF8, GNAI3, KATNB1, PDXP, CDCA8, AURKB, AURKA, HSP90B1, SPAST, RACGAP1, KATNA1, ECT2, MYH10, HSPA5, SPAG5, RCC2, PLK1, SHCBP1, KLHL9, AGBL5, CENPE, CENPF, SCCPDH, PRC1, KIF…	5251	129	18224	1.66803	0.0075726	0.000475087	0.000455475
GOTERM_CC_DIRECT	GO:0000922~spindle pole	54	0.955414	9.31039e-06	GPSM2, NUMA1, KIF11, FRY, CEP128, FAM110A, CDC20, NUP62, KNTC1, NEK2, CEP95, TOPBP1, SPDL1, CKAP2L, DNAAF1, DDX11, PLEKHG6, CKAP2, RANGAP1, KNSTRN, CKAP5, CDC25B, SGO1, PSRC1, KIF2A, ZW10, PKP4, CEP63, MAD1L1, CEP104, CTDP1, VPS4A, KATNB1, WDR62, PPP2CA, CCNB1, HAUS8, KATNA1, POC1A, SPAG5, NEK6, PLK1, RMDN1, CDC6, RAB11A, TPX2, CENPF, PRC1, TACC3, AUNIP, CEP85, CEP44, CEP89, MAD2L1	5251	109	18224	1.71937	0.0109906	0.000650084	0.000623248
GOTERM_CC_DIRECT	GO:0031012~extracellular matrix	120	2.12314	1.48688e-05	SPON1, PLAT, RPL9, LOXL1, COMP, EFTUD2, EFEMP1, IBSP, RPS19, RPS10, RPS13, TGM2, POSTN, CD93, SERPINF1, RPL22, PCOLCE, SFRP2, COL4A1, COL8A2, COL8A1, S100A9, FBN2, FBN3, PRKDC, TSHZ2, RPN1, HTRA1, LTBP4, DPT, LPL, FBLN1, AEBP1, LTBP3, NID1, FBLN2, FBLN5, HSP90B1, PRDX1, IGFBP7, NDP, APOE, HSPA5, TGFB3, SSC5D, EEF2, BMP7, CCT6A, COL1A1, HNRNPM, HNRNPK, COL1A2, CILP, COL5A2, OGN, CALR, FBN1, FGF10,…	5251	296	18224	1.40699	0.0174946	0.000980517	0.000940041
GOTERM_CC_DIRECT	GO:0031965~nuclear membrane	96	1.69851	2.47525e-05	IPO13, C2ORF42, MRPS15, NUP107, MRPS14, NUDT1, MRGPRF, YBX1, TMEM97, IPO4, LMNB1, SYNE1, AQP1, CDC14B, PCM1, XPO1, EDNRB, CCND2, RPS6KA2, NUP62, EPC1, TSPO, RCC1, RRP12, QSOX2, TNPO1, SEPHS1, SLC16A3, TNPO2, EMD, LBR, TNPO3, TMPO, NDC1, IL15RA, RBM15, NUP210, TEX10, MYOF, MRPS23, CEP131, ALG14, AEN, NUTF2, TMC6, RANGAP1, GTPBP4, NUP93, DDX19A, ELF4, NUP50, MRTO4, TRIB3, NUP98, INA, GAPDH, DTL, PA…	5251	229	18224	1.45491	0.0289541	0.00154638	0.00148254
GOTERM_CC_DIRECT	GO:0005913~cell-cell adherens junction	128	2.26469	2.72996e-05	RPL34, PARK7, ENO1, BZW2, PVR, RPL6, CRKL, BAIAP2L1, CDH3, CDH2, PPME1, RUVBL1, ARFIP1, SH3GL1, TMPO, CAST, SH3GLB2, CSNK1D, SCRIB, SND1, HCFC1, ATXN2L, CHMP4B, TAGLN2, PKP3, RPL29, PFN1, PHLDB2, DSC2, LRRC59, MACF1, UBFD1, ZC3HAV1, EVPL, PPL, NDRG1, CNN3, CCNB2, LDHA, SNX1, KLC2, LARP1, SNX2, PRDX1, MYO6, STK38, SFN, ARGLU1, SPTBN1, S100A11, MARK2, GCN1, SNX5, SPTBN2, LYN, VASP, HSPA5, PARVA, EE…	5251	323	18224	1.37534	0.0318857	0.00162023	0.00155335
GOTERM_CC_DIRECT	GO:0005635~nuclear envelope	71	1.25619	2.93908e-05	NUP107, NUP188, CSE1L, ROGDI, NRM, ATRAID, CLGN, LMNB1, SYNE1, IPO9, XPO1, SLC22A18, GPER1, NUP62, ANXA7, EMD, LBR, TMPO, NDC1, BNIP3L, SREBF1, DST, NUP210, MYOF, SIGMAR1, ANXA11, RANGAP1, TMEM170A, SIRT1, NUP93, NEMP2, NPC1, TNMD, TYRO3, CHMP4B, NUP98, DNASE1, NEMP1, PAFAH1B1, LRRC59, NUP205, SEH1L, SP140, PTGER3, MGST2, LTC4S, AGPAT3, NUP160, EBP, POM121C, NUP85, RAE1, ABCF1, MAPK3, RANBP1, RRM…	5251	159	18224	1.54975	0.0342859	0.00166128	0.0015927
GOTERM_CC_DIRECT	GO:0005813~centrosome	161	2.84855	5.00911e-05	ERCC6L, NUP107, CEP120, CIB1, CDC20, ZFYVE26, TBC1D31, CHEK1, NEK1, CEP250, NEK2, CEP95, MAF1, CDK5RAP3, SKP1, GEN1, G6PD, CEP135, HARBI1, DDX11, CEP131, CSNK1D, SYTL4, CDC25B, SGO1, PROCR, FEZ1, ATF5, MAD1L1, BRSK1, ARL3, CEP85L, NCAPG, WDR62, NDRG1, PKHD1, CCNB2, CCNB1, SPAST, CEP70, NDN, CEP72, ATP6V1D, PIBF1, PLK4, BBS1, STIL, CCDC14, PLK2, PLK1, RITA1, IFT20, AHI1, RGCC, HOOK2, STK26, ID1, C…	5251	426	18224	1.31165	0.0577264	0.00270264	0.00259108
GOTERM_CC_DIRECT	GO:0000790~nuclear chromatin	82	1.45081	5.87337e-05	CALCOCO1, SMARCB1, SETD3, KDM1A, CITED2, EHMT2, HMGB2, ACTB, IPO4, CHAF1B, CHAF1A, EME1, SOX18, RCC1, JUNB, TP63, ZNF385A, GABPA, MEN1, NCOA1, MEF2A, TIPIN, SMARCC2, NCOA3, BUD31, DDX11, TCF12, ACTL6A, ETV3, RUNX3, SIRT1, POU5F1, MSH6, AR, NCOR1, IRF1, TIMELESS, ASF1B, PPARD, CEBPB, SMARCD2, HDAC2, SMARCD3, UHRF1, GATA3, RAD51AP1, MUC1, RXRA, NRIP1, MCMBP, DVL3, STAT6, E2F4, MTA2, SMARCE1, CBX8, …	5251	193	18224	1.47455	0.0673441	0.00303117	0.00290604
GOTERM_CC_DIRECT	GO:0072686~mitotic spindle	25	0.442321	6.70531e-05	NUMA1, CAPG, PKD2, AURKA, PKHD1, RACGAP1, MAPK1, ECT2, CLASP2, SPAG5, KIF23, KIF22, RANGAP1, CCSAP, KNSTRN, GEM, AGBL5, DIAPH1, YEATS2, ESPL1, EFHC1, CDK1, PKP4, MAD1L1, MAD2L1	5251	41	18224	2.11621	0.0765094	0.00331633	0.00317943
GOTERM_CC_DIRECT	GO:0005759~mitochondrial matrix	126	2.2293	0.000134811	DMGDH, GLDC, NUDT1, NUDT2, ABAT, ACSM5, PARK7, ALKBH7, NR3C1, YARS2, GCSH, FLAD1, PDK4, LONP1, PDK3, PMPCA, HADH, PDK2, ACOT9, PDHX, GSTK1, PHYKPL, DIMT1, PUS1, GPT2, MCCC1, BTD, PPA2, MTHFD2, LACTB2, CLPP, PPIF, SUCLG2, ISCU, LIPT1, SHMT2, AK3, LIAS, ACAT1, PRDX3, PRDX5, PITRM1, GRPEL1, CYP11A1, GRPEL2, PCK2, TRAP1, PDHA1, UQCC2, ADHFE1, PDE2A, IDH2, PYCR1, TIMM44, ERAL1, ACADSB, ACSF3, CS, COQ3…	5251	327	18224	1.33729	0.147883	0.00640083	0.0061366
GOTERM_CC_DIRECT	GO:0043209~myelin sheath	66	1.16773	0.000158122	GPI, CNRIP1, GDI2, ACTB, TUBA1B, UCHL1, TUBA1A, DPYSL2, UQCRFS1, PHGDH, NEFH, GLUL, YWHAG, CCT3, CCT2, HSP90AA1, MIF, ATP1B1, SDHA, SYN2, DNM1, CLDN11, PKM, NDUFS3, VDAC2, VDAC1, UQCRC2, SLC25A12, SLC25A5, TKT, INA, RALA, VCP, STXBP1, ATP1A2, ITPR3, NDRG1, COX5A, NAPG, HSPD1, PRDX3, STIP1, LDHB, GJC3, PRDX1, CCT5, PDHA1, KCNJ11, MDH1, HSPA5, SRD5A1, MDH2, MSN, HSPA2, TUBB4B, SOD2, TUBB4A, SOD1, E…	5251	152	18224	1.50696	0.171142	0.00721889	0.00692089
GOTERM_CC_DIRECT	GO:0005758~mitochondrial intermembrane space	37	0.654636	0.000237865	PANK2, DTYMK, STOML2, SHMT2, DIABLO, TIMM10, TRIAP1, PARK7, CHCHD4, NLN, CHCHD5, CHCHD2, AIFM1, OPA1, CHCHD7, COA7, COA6, PRELID3A, PRELID3B, COA4, LYN, TIMM8A, TRAP1, NDUFA8, UQCC2, TIMM23, SUOX, SOD1, GATM, PINK1, NDUFS5, CAT, TXNIP, MICU2, CIAPIN1, THOP1, CEP89	5251	74	18224	1.73529	0.246012	0.0104572	0.0100256
GOTERM_CC_DIRECT	GO:0042555~MCM complex	9	0.159236	0.000316527	MMS22L, MCM7, MCM3, TONSL, MCMBP, MCM4, MCM5, MCM6, MCM2	5251	9	18224	3.47058	0.313244	0.0134185	0.0128645
GOTERM_CC_DIRECT	GO:0005839~proteasome core complex	15	0.265393	0.000354076	PSMB10, PSMA7, PSMB9, PSMA5, PSMB6, PSMA6, PSMB7, PSMA3, PSMB4, PSMA4, PSMB5, PSMB2, PSMB3, PSMB1, PSME4	5251	21	18224	2.47898	0.343191	0.0138624	0.0132902
GOTERM_CC_DIRECT	GO:0005694~chromosome	48	0.849257	0.000355396	MDC1, CDCA2, DDX27, NUMA1, EHMT2, HMGB3, C1ORF131, PDS5B, BRCA1, SMC4, ZBTB4, RECQL4, RNF212, FBL, PPP1R7, TOP1MT, PES1, RAD21, NUSAP1, TOPBP1, HORMAD1, KMT5A, POLQ, IL33, DDX18, SUPT16H, UTP4, C11ORF80, CCDC137, NCAPH2, ZBTB38, SETDB2, TOP3A, PRPF4B, SSRP1, FBXO11, PUM3, CENPE, STAG1, KIF4A, SPRTN, MPHOSPH10, INTS7, TOP1, ZMYND11, NEIL1, DTL, RHNO1	5251	105	18224	1.58655	0.34422	0.0138624	0.0132902
GOTERM_CC_DIRECT	GO:0000775~chromosome, centromeric region	30	0.530786	0.000362035	DSCC1, HJURP, CDCA8, PDS5B, MKI67, CENPA, PKHD1, PPP2CA, RAD21, NUF2, OIP5, HELLS, CENPW, CBX3, PPP2R5A, PPP2R5C, NDC80, SMC1B, SGO1, SGO2, CENPE, STAG1, CENPF, INCENP, ZW10, CENPL, BIRC5, CENPN, KIF2C, CENPQ	5251	57	18224	1.82662	0.349369	0.0138624	0.0132902
GOTERM_CC_DIRECT	GO:0019013~viral nucleocapsid	18	0.318471	0.000430208	AHNAK, LARP1B, HNRNPL, EFTUD2, SYNCRIP, HNRNPM, HNRNPK, HNRNPDL, SNRNP70, SNRPD1, HNRNPD, SNRPA1, SNRPB2, PRPF31, SNRPC, HNRNPA1, SNRNP200, SNRPB	5251	28	18224	2.23109	0.399965	0.0159005	0.0152441
GOTERM_CC_DIRECT	GO:0015629~actin cytoskeleton	87	1.53928	0.000442052	NPFFR2, TCERG1, ONECUT2, ARPC1B, ARPC1A, HSPB7, FHL2, TRIOBP, BAIAP2L2, BAIAP2L1, KNTC1, MYOZ3, TOPBP1, SLC16A3, NDC1, ACTR3, ACTR2, GAS2L3, DST, DAPK1, TNNC1, DENND2A, CASK, ACTN4, SHROOM4, ACTA2, ADAM17, SYNPO2L, SCNN1D, PALLD, CDC42EP1, AMPH, LCP1, PPP1R12B, MAD1L1, DBN1, STOML2, CTDP1, AHNAK, TMEM63B, KLHL17, NCAPG, PDXP, IQGAP2, CORO1A, GABARAP, CORO1C, CNN3, LIMA1, FGD4, ABLIM1, ORC6, ABLIM…	5251	218	18224	1.38505	0.408345	0.0159005	0.0152441
GOTERM_CC_DIRECT	GO:0042101~T cell receptor complex	13	0.230007	0.000955438	STOML2, SYK, CD3G, CD3E, CD3D, ZAP70, CD4, ALCAM, CD6, CD8A, CD247, CARD11, SKAP1	5251	18	18224	2.50653	0.678464	0.033356	0.0319791
GOTERM_CC_DIRECT	GO:0005819~spindle	52	0.920028	0.00113194	RB1, INVS, RIF1, NUMA1, HEPACAM2, KIF11, NR3C1, KIF15, CDC20, RPS6KA2, NUSAP1, ZNF207, FBXO5, TTC23L, MAP1S, NSUN2, MTUS1, ACOT13, ANXA11, VRK1, KIF23, CSNK1D, CCSAP, MID1, KLHL42, PSRC1, INCENP, KIFC1, BIRC5, KIF20A, MAPRE1, MAD1L1, CTDP1, TTK, AURKB, AURKA, SPAST, HAUS7, NUP85, KATNA1, MYH10, SAC3D1, MAP2K5, SPAG8, CBX3, PLK1, SHCBP1, MAD2L2, TPX2, CENPF, PRC1, KBTBD8	5251	121	18224	1.49149	0.739297	0.0383889	0.0368042
GOTERM_CC_DIRECT	GO:0005815~microtubule organizing center	63	1.11465	0.00119685	C2CD5, PHF1, CCDC124, SNX10, FRY, PHF7, NR3C1, TRIOBP, CEP128, FAM110A, AKAP11, RUVBL1, FAM110B, CHMP1A, CCDC96, CEP250, SPDL1, DLGAP5, TTC23L, UBXN6, SCYL1, ZNF365, CEP68, MAP2K1, G6PD, CEP131, MTUS1, IFT43, KIFC1, SUCLG2, RPP25, NEIL1, MCPH1, ATF4, CAMK2B, PXK, AK5, TAF1D, KATNA1, MAPK1, SAC3D1, RAB11FIP5, CLASP2, BBS2, SPAG9, ARFGEF2, GSDMC, YES1, NEK6, CEP152, LCA5, DDHD2, UPF3B, LRWD1, YIF1A…	5251	153	18224	1.42906	0.75865	0.0394627	0.0378336
GOTERM_CC_DIRECT	GO:0005762~mitochondrial large ribosomal subunit	25	0.442321	0.00155365	MRPL18, MRPL38, MRPL16, MRPL17, MPV17L2, MRPL58, MRPL36, MRPL14, MRPL15, MRPL37, MRPL12, MRPL13, MRPL35, MRPL54, MRPL11, MRPL55, MRPL4, MRPL3, MRPL42, MRPL2, MRPL9, MRPL28, MRPL47, MRPL21, MRPL51	5251	48	18224	1.80759	0.842072	0.0498427	0.0477852
GOTERM_CC_DIRECT	GO:0000785~chromatin	40	0.707714	0.00176536	L3MBTL1, RB1, KDM3B, PARPBP, MCM7, PPP1R10, DSCC1, JMJD1C, UBR2, ARRB1, HR, PDS5B, PARK7, MTBP, CCND2, RAD21, CHEK1, OIP5, JUNB, TMPO, MEN1, UBE2B, CBX3, PLK2, PLK1, HMGA1, UBE2A, KIF22, TOX4, POLA1, SFPQ, STAG1, CENPF, PINK1, RAD51, MYCN, CDK4, EIF3E, MCM2, ASF1B	5251	89	18224	1.55981	0.877216	0.0551442	0.0528678
GOTERM_CC_DIRECT	GO:0042470~melanosome	44	0.778485	0.0021069	RAB5B, TMED10, HSP90AB1, AHCY, TFRC, RPN1, SLC2A1, CAPG, SLC3A2, SLC1A5, HSP90B1, SYNGR1, PRDX1, STOM, MYH11, STX3, RAB2A, HSP90AA1, ATP6V1G2, ANKRD27, HSPA5, ANXA2, SERPINF1, TRPV2, SYTL1, GGH, MYO5A, ANXA11, ATP1B3, RAB27B, MYRIP, MYO7A, PDIA6, YWHAZ, SND1, PDIA4, SYTL2, SYPL1, DNAJC5, RAB35, SGSM2, CALU, RAB17, P4HB	5251	101	18224	1.51193	0.918204	0.0641254	0.0614782
GOTERM_CC_DIRECT	GO:0030529~intracellular ribonucleoprotein complex	56	0.9908	0.0023075	GSK3B, JRK, DYRK2, EIF4A3, SRA1, BRCA1, YBX1, ACTB, LARP1B, RPS4X, EFTUD2, SYNCRIP, ZFP36, XPO1, SNRPD1, NUP62, RPS9, NCBP1, PABPC4, SECISBP2, RPL22, ACTN4, ILF2, PATL2, JMJD6, NCL, PIH1D2, SNRPA1, PABPC1, SNRNP200, GAPDH, SNRPB, SLBP, MVP, ZFP36L2, ZFP36L1, HNRNPDL, PABPN1, PUF60, SNRPB2, HNRNPA1, HNRNPA0, CPSF6, CSNK1A1, CPSF3, LARP7, EEF2, HNRNPAB, LRPPRC, HNRNPL, HNRNPM, BOP1, HNRNPK, AGO1, A…	5251	136	18224	1.42906	0.935569	0.068475	0.0656483
GOTERM_CC_DIRECT	GO:0030687~preribosome, large subunit precursor	17	0.300778	0.00259227	TEX10, NIP7, WDR74, RRP1B, WDR12, FTSJ3, BOP1, NSA2, EBNA1BP2, EIF6, LAS1L, PES1, MRTO4, RRS1, CCDC86, RRP15, MDN1	5251	29	18224	2.03448	0.954087	0.0737193	0.0706761
GOTERM_CC_DIRECT	GO:0070382~exocytic vesicle	11	0.194621	0.00260843	DPYSL3, ANXA13, SYTL1, IGF1, SYT9, SYTL4, SYTL3, UNC13D, SYT17, SYT6, SYTL2	5251	15	18224	2.54509	0.954962	0.0737193	0.0706761
GOTERM_CC_DIRECT	GO:0005811~lipid particle	31	0.548478	0.00293171	VCP, HILPDA, LPCAT1, HSD17B11, LIPE, NSDHL, SPAST, IRAK1, BCAP31, TRAP1, STARD13, RSAD2, ANXA2, CAV1, SIGMAR1, FAAH2, CIDEA, LSS, CKAP4, CIDEC, EHD1, SCCPDH, FABP4, PITPNM1, PLIN4, PNPLA4, PLIN2, PLIN1, GAPDH, RAB3GAP1, PNPLA2	5251	66	18224	1.63012	0.969348	0.0776164	0.0744124
GOTERM_CC_DIRECT	GO:0005681~spliceosomal complex	41	0.725407	0.00298482	RBM28, RBM25, SF3B2, SF3B3, TXNL4B, PRCC, WDR83, U2AF1, TTF2, DDX41, USP39, EFTUD2, HELB, DHX32, HNRNPDL, SNRPD2, U2AF2, SNRNP70, DHX16, SNRPB2, HNRNPA1, CTNNBL1, RBM5, BUD31, WBP11, LSM5, LSM4, PRPF4, HNRNPM, DDX39A, RHEB, SRSF2, SNRPG, PPIH, SNRPA1, SREK1, SNRPF, SNRNP200, SLU7, SNRPA, SNRPB	5251	94	18224	1.51376	0.971226	0.0776164	0.0744124
GOTERM_CC_DIRECT	GO:0031298~replication fork protection complex	7	0.12385	0.00300788	GINS2, TIPIN, CDC45, TOP1MT, GINS4, MCM10, TOP1	5251	7	18224	3.47058	0.972005	0.0776164	0.0744124
GOTERM_CC_DIRECT	GO:0000779~condensed chromosome, centromeric region	7	0.12385	0.00300788	SGO1, CENPE, CEBPB, CBX3, NCAPD2, NCAPD3, AURKB	5251	7	18224	3.47058	0.972005	0.0776164	0.0744124
GOTERM_CC_DIRECT	GO:0046930~pore complex	8	0.141543	0.00331471	TOMM40, NUP62, BCL2, VDAC3, BAX, VDAC2, VDAC1, BAK1	5251	9	18224	3.08496	0.980573	0.0837141	0.0802584
GOTERM_CC_DIRECT	GO:0005871~kinesin complex	26	0.460014	0.00346839	KIF14, KIF11, KIF17, KLC3, KLC2, KIF5C, KIF13B, NPHP3, KIF21A, KIF21B, KIF3C, KIF1A, KIF24, KIF23, KIF22, CENPE, KIF18A, KIF18B, KIF2A, KIFC2, KIFC1, KIF16B, KIF4A, KIF2C, KIF20A, PAFAH1B1	5251	53	18224	1.70255	0.983823	0.0857704	0.0822298
GOTERM_CC_DIRECT	GO:0071013~catalytic step 2 spliceosome	40	0.707714	0.00361958	SF3B2, SF3B3, DDX23, SRSF1, EIF4A3, PPWD1, WDR83, U2AF1, DDX41, EFTUD2, SYNCRIP, SNRPD2, SNRPD1, MAGOH, DHX38, RALY, SNRPB2, HNRNPA1, SRRM2, PPIL1, ALYREF, PRPF4B, MAGOHB, LSM2, XAB2, HNRNPM, LSM7, PHF5A, HNRNPK, SYF2, SNRPG, SNRPA1, PABPC1, SNRPF, NRDE2, SNRNP200, PPIL3, SLU7, RBM22, SNRPB	5251	92	18224	1.50895	0.986489	0.0876825	0.0840629
GOTERM_CC_DIRECT	GO:0000932~cytoplasmic mRNA processing body	35	0.61925	0.00373171	ZFP36L1, EDC4, ZFP36, NOCT, POLR2D, POLR2G, DCPS, RBPMS, APOBEC3H, LSM1, SAMD4A, SAMD4B, WTIP, LSM4, RC3H2, PATL1, PATL2, PNRC2, LSM2, PAN2, PSMA6, CARHSP1, CPEB1, PAN3, PSMA4, PSMC3, AGO3, CNOT1, AGO1, PSMC2, AGO2, CNOT3, TOP1, CNOT9, DCP1B	5251	78	18224	1.55731	0.988178	0.0885909	0.0849338
GOTERM_CC_DIRECT	GO:0005764~lysosome	85	1.50389	0.00386745	SCARB2, DOC2A, CPQ, CTSZ, TNFAIP3, TMEM97, CTSV, IFI30, RPTOR, FYCO1, GJA1, CTSO, CTSL, SMPD1, CTSK, PEBP4, HYAL3, CTSF, CAPN1, HLA-DOB, CD34, CTBS, CTSC, RUBCN, USP5, TMEM175, UNC13D, RRAGA, NPC1, RRAGC, RRAGB, RRAGD, CAT, TLR9, TMEM106B, PLBD1, IFNAR1, RAMP2, ASAH1, RAMP3, CALCRL, SRC, UNC93B1, PON2, VPS4A, PRCP, ADRB2, ABCB9, LRP2, ZC3HAV1, CD1C, GABARAP, CST3, TRPM2, DPP7, DRAM1, PSAP, VPS11,…	5251	226	18224	1.30531	0.989944	0.0891409	0.0854611
GOTERM_CC_DIRECT	GO:0005763~mitochondrial small ribosomal subunit	15	0.265393	0.00398017	MRPS17, MRPS15, MRPS26, MRPS36, MRPS14, MRPS33, MRPS22, MRPS12, MRPS31, MRPS18A, MRPS2, MRPS7, MRPS5, MRPL42, MRPS9	5251	25	18224	2.08235	0.991208	0.0891409	0.0854611
GOTERM_CC_DIRECT	GO:0000793~condensed chromosome	15	0.265393	0.00398017	TOP3B, TOP2A, L3MBTL1, HMGB2, AKAP8, MKI67, BAZ1B, SMC2, RAD51, FANCD2, PES1, CDK2, BANF1, NCAPD2, PAM	5251	25	18224	2.08235	0.991208	0.0891409	0.0854611
GOTERM_CC_DIRECT	GO:0005783~endoplasmic reticulum	274	4.84784	0.00413652	PKD2L1, ZDHHC1, ZDHHC2, ZFYVE1, IFIT2, VPREB3, NSDHL, TCL1A, CREB3L4, ARL6IP5, PIEZO1, SCAPER, SIL1, SEC63, RSAD2, ENTPD5, PRKCE, HLA-B, P3H2, ALG3, MOGS, CEL, P3H3, HLA-F, FNDC5, CPED1, ZW10, KDELR2, MPPE1, CES2, SET, RPN2, ABCB6, TMTC2, MGST2, ABCB9, HACD2, MTDH, PGS1, APH1B, SPAST, STC2, RRS1, SERPINH1, MLEC, HMOX1, SLAMF7, APOD, APOE, ARSG, TRPM4, B3GALNT2, CTSA, EDEM3, FIS1, XBP1, TMEM50B, L…	5251	828	18224	1.14848	0.992703	0.0909269	0.0871733
GOTERM_CC_DIRECT	GO:0005604~basement membrane	35	0.61925	0.00476506	COL17A1, LAD1, CD151, LAMA2, LAMA4, LAMA3, NTN4, FBLN1, PTN, NID1, THBS2, THBS4, LOXL1, CST3, EFEMP2, EGFLAM, TIMP3, EGFL6, DST, ANXA2, LAMB2, SERPINF1, APLP1, P3H2, CASK, NPNT, SMOC2, CCDC80, COL4A1, COL8A2, RELL2, FREM1, FBN1, MEGF9, MATN2	5251	79	18224	1.5376	0.996551	0.101029	0.0968582
GOTERM_CC_DIRECT	GO:0015630~microtubule cytoskeleton	55	0.973107	0.00476631	SRA1, LYST, ALKBH8, ALKBH2, RUSC1, DNM1L, SPTAN1, IQCB1, GAS2L3, PRKCI, DST, CEP131, CKAP2, TUBG2, AXIN2, KNSTRN, MID1, CKAP5, EML4, THAP6, IFT43, PSRC1, FEZ1, MAP7D2, TIMELESS, KIF2C, GAPDH, MCM2, SHMT2, KATNB1, NDRG1, SPATA7, AURKA, PPP2CA, CCNB2, NUAK1, SPAST, MAPK1, MAPK3, ESRRA, ZBTB18, SPAG6, PLK1, CDC7, CENPE, TPX2, KIF18A, VAPA, FES, PRC1, TACC3, ID3, ZNF415, TACC1, CDK16	5251	137	18224	1.3933	0.996556	0.101029	0.0968582
GOTERM_CC_DIRECT	GO:0030667~secretory granule membrane	13	0.230007	0.00610504	RPH3AL, PTPRN2, TMED10, ICA1, ITPR2, ITPR3, SYT9, VAMP8, RAB26, CA4, CPE, PAM, VAMP2	5251	21	18224	2.14845	0.999303	0.127135	0.121887
GOTERM_CC_DIRECT	GO:0005840~ribosome	64	1.13234	0.00669069	MRPS17, MRPS15, RPL3, MRPS14, RPL34, MRPL38, MRPS10, MRPL37, RPL8, RPL9, MRPL35, RPL6, MRPL4, RPS6KA4, RPS4X, MRPL42, MRPL3, MRPL2, RPS19, RPS6KA2, DENR, MRPL9, RPS10, RPS13, NCK1, RPS9, MRPS27, MRPS22, RPL22, MRPS23, MRPS18A, MRPS2, MRPS7, MRPL44, MRPS9, RPL29, RPS19BP1, MRPL18, MRPS33, MRPL16, MRPL17, RPS27L, MRPL14, RRBP1, MRPS30, HSPA14, MRPL13, MRPL54, MRPL55, MRPL11, RPL13, RPL15, GCN1, ABC…	5251	166	18224	1.33805	0.999654	0.136671	0.131029
GOTERM_CC_DIRECT	GO:0005643~nuclear pore	32	0.566171	0.00679325	ENY2, NUP205, NUP107, NXT1, MVP, IPO4, NUP160, NXF1, POM121C, NUP62, KPNA4, NUP88, KPNA2, RAE1, AGFG1, KPNA1, EIF5A, NDC1, NUP155, NUP210, MX2, NUP153, RANGAP1, NUP93, PARP11, DDX19A, MYO1C, XPOT, NUP50, NUP98, MAD1L1, MAD2L1	5251	72	18224	1.54248	0.999694	0.136671	0.131029
GOTERM_CC_DIRECT	GO:0005658~alpha DNA polymerase:primase complex	6	0.106157	0.00903666	PRIM2, POLA1, POLA2, HELB, PRIM1, MCM3	5251	6	18224	3.47058	0.999979	0.173898	0.16672
GOTERM_CC_DIRECT	GO:0031390~Ctf18 RFC-like complex	7	0.12385	0.00908316	RFC5, RFC3, RFC4, RFC2, DSCC1, DDX11, CHTF18	5251	8	18224	3.03675	0.99998	0.173898	0.16672
GOTERM_CC_DIRECT	GO:0008541~proteasome regulatory particle, lid subcomplex	7	0.12385	0.00908316	PSMD8, PSMD12, PSMD11, PSMD14, PSMD13, ADRM1, PSMD3	5251	8	18224	3.03675	0.99998	0.173898	0.16672
GOTERM_CC_DIRECT	GO:0016023~cytoplasmic, membrane-bounded vesicle	54	0.955414	0.00931796	USP6NL, PIGT, CHIC1, TFRC, PRF1, FASLG, SLA2, DUSP16, HERC3, RUSC1, ARHGDIB, PALM, SYBU, AGFG1, WLS, PDGFRB, ARRDC4, CD93, DST, SIGMAR1, AXIN2, COMMD7, TRAF7, TBC1D7, NUMB, RIN3, ANG, SGK3, BECN1, RGS19, MAPKAP1, OPRL1, SNX33, NKD2, IFT74, EBP, DPP7, SOCS1, MYO6, NTF3, ESD, RGS20, ARFGEF2, DMTN, HPS1, CCDC88A, MYO1C, ARHGAP30, FES, GIPC1, SERHL2, PKN1, CORO7, KCNK1	5251	138	18224	1.35805	0.999985	0.175562	0.168315
GOTERM_CC_DIRECT	GO:0031519~PcG protein complex	15	0.265393	0.00974844	CBX8, CBX7, CBX6, PCGF6, PHC1, KDM2B, CSNK2A1, RING1, PCGF2, CBX2, CSNK2A2, BMI1, PHC3, CSNK2B, SKP1	5251	27	18224	1.9281	0.999991	0.180803	0.173339
GOTERM_CC_DIRECT	GO:0005911~cell-cell junction	65	1.15004	0.0103186	APP, ITK, BMPR2, SNAP23, SLC2A1, PTPRM, AQP7, CD3E, PKD2, TMEM47, CDH5, CDH2, NCK1, MAGI1, CD53, ACTR3, MAP2K2, ANXA2, HEG1, MAGI3, CASK, FRS2, SCRIB, ACTN4, CLDN5, ZAP70, ADAM17, AMTN, PKP4, PKP3, PRKD1, STEAP1, SKAP1, COL17A1, CDCA3, HEPACAM, HPN, PIK3R1, CORO1A, IQGAP3, FLRT2, FLRT3, CTNNA1, FLNA, CDH24, CSK, STX3, PLCG1, ECT2, PDLIM7, CARMIL2, FZD4, CDC42BPB, CDC42BPA, WTIP, GRHL2, PPP1CA, CD…	5251	172	18224	1.31156	0.999996	0.186257	0.178569
GOTERM_CC_DIRECT	GO:0005578~proteinaceous extracellular matrix	96	1.69851	0.0103564	SPON1, ECM1, COL16A1, OLFML2B, ECM2, COL14A1, NCAN, ELN, FGF1, HAPLN3, CPZ, GLDN, COMP, ADAMTS5, EFEMP1, ADAMTSL5, CHL1, TNN, MMP28, ADAMTSL2, TIMP2, TIMP3, EMILIN2, TIMP4, SBSPON, POSTN, VWF, MMP1, MMP2, MAMDC2, WNT5A, OMD, KERA, NPNT, MMP9, TGFBR3, MMP12, VCAN, CRISPLD2, GFOD2, COL4A6, COL8A2, ANOS1, AMTN, TFF3, COL4A5, COL6A3, SPARCL1, MATN3, MATN2, FBLN7, FBN2, COL17A1, FBN3, PAPLN, LTBP4, DP…	5251	268	18224	1.24319	0.999996	0.186257	0.178569
GOTERM_CC_DIRECT	GO:0005741~mitochondrial outer membrane	57	1.00849	0.0125597	SLC44A1, CISD1, TOMM22, GJA1, OPA1, TSPO, USP30, DNM1L, TOMM70, BNIP3L, CPT1A, RSAD2, TOMM34, NME1, QTRT2, IFI27, VDAC3, VAMP1, VDAC2, PGAM5, VDAC1, PGR, RAF1, LETMD1, SPATA18, PPP1R15A, NLRX1, TOMM40, ABCB6, MAOA, ACACB, GK2, CYP27B1, BCL2L11, MFN1, BAK1, BID, RAB11FIP5, CYB5B, MOAP1, CYB5A, MTERF3, MTX1, MTX3, BRI3BP, MYO19, ASS1, PINK1, GPAM, TOMM7, BCL2, BAX, RTN4IP1, LPIN1, BCL2L2, TOMM5, TO…	5251	149	18224	1.32767	1	0.222513	0.213327
GOTERM_CC_DIRECT	GO:0016323~basolateral plasma membrane	67	1.18542	0.0133144	HSP90AB1, TFRC, KCNC2, AQP9, SLC40A1, SLC2A1, ARRB1, PTH1R, SLC4A2, AQP1, ATP7B, CDH2, PALM, CA4, LEPR, CA9, ATP7A, MAP4K2, ABCC1, HSP90AA1, ANXA2, ITGA3, ANXA13, ABCC6, CASK, ANK2, SCRIB, ATP1B1, ADRA2A, DISP1, SLC7A6, SLC7A7, SLC7A8, NUMB, TLR9, ORAI1, RHCG, CD46, NDRG4, STXBP3, HPGD, STK39, TGFA, NOD2, SLC9A1, NKD2, P2RY6, ERBB3, EPCAM, OTOF, LDLR, SLC19A1, GPIHBP1, CA11, SLC14A1, ST14, CAV1, …	5251	180	18224	1.29183	1	0.232414	0.22282
GOTERM_CC_DIRECT	GO:0005732~small nucleolar ribonucleoprotein complex	9	0.159236	0.0140989	NOP56, NOP58, LSM7, NHP2, SNRPG, MPHOSPH10, SNRPF, NOP10, SNRPB	5251	13	18224	2.40271	1	0.239078	0.229208
GOTERM_CC_DIRECT	GO:0035102~PRC1 complex	9	0.159236	0.0140989	CBX8, CBX7, PCGF6, PHC1, RING1, PCGF2, CBX2, BMI1, PHC3	5251	13	18224	2.40271	1	0.239078	0.229208
GOTERM_CC_DIRECT	GO:0000794~condensed nuclear chromosome	15	0.265393	0.0144039	NIFK, BRCA1, TUBG1, LRPPRC, RSPH1, RAD51, RAD51C, AGO3, CHEK1, CHMP1A, RRS1, RCC1, NEK2, RGS12, TOPBP1	5251	28	18224	1.85924	1	0.240809	0.230869
GOTERM_CC_DIRECT	GO:0034399~nuclear periphery	12	0.212314	0.0194509	NUP93, EBNA1BP2, NUP205, NUP107, PSIP1, NUP153, NUP98, MAPT, TNPO1, TNPO2, IPO4, ATF4	5251	21	18224	1.98319	1	0.319166	0.305991
GOTERM_CC_DIRECT	GO:0000178~exosome (RNase complex)	10	0.176929	0.0196286	ZFP36, EXOSC5, EXOSC4, DIS3, EXOSC9, KHSRP, EXOSC3, EXOSC2, EXOSC1, MPHOSPH6	5251	16	18224	2.16911	1	0.319166	0.305991
GOTERM_CC_DIRECT	GO:0005777~peroxisome	41	0.725407	0.0211649	ABCD3, MVK, PEX11A, PEX11B, HSD17B4, IDE, DDO, HMGCL, RIDA, PRDX5, AKAP11, SCP2, HACL1, ACADM, DNM1L, ACAA1, ACAD11, ABCD1, NUDT12, FIS1, GSTK1, AOC1, EPHX2, IDH2, MYO5A, PEX13, DHRS4, SOD1, ALDH3A2, TMEM135, ACOX2, ACOX1, CAT, SERHL2, TRIM37, MVD, FAR2, PEX11G, TKT, CRAT, ACOT4	5251	104	18224	1.36821	1	0.339497	0.325482
GOTERM_CC_DIRECT	GO:0051233~spindle midzone	11	0.194621	0.0246032	APP, CTDP1, RACGAP1, PLK1, KIF14, CDCA8, PKP4, CDC6, AURKB, GEM, AURKA	5251	19	18224	2.00928	1	0.381297	0.365557
GOTERM_CC_DIRECT	GO:0005847~mRNA cleavage and polyadenylation specificity factor complex	9	0.159236	0.0246811	CPSF4, CPSF1, FIP1L1, CSNK1A1, ZC3H3, CPSF3, CSTF2, SSU72, CSTF2T	5251	14	18224	2.23109	1	0.381297	0.365557
GOTERM_CC_DIRECT	GO:0032040~small-subunit processome	17	0.300778	0.0247345	NOP56, UTP6, NOP58, NOP14, UTP11, IMP3, UTP23, HEATR1, NOC4L, IMP4, PWP2, WDR46, RRP9, FBL, EMG1, MPHOSPH10, DCAF13	5251	35	18224	1.68571	1	0.381297	0.365557
GOTERM_CC_DIRECT	GO:0034448~EGO complex	5	0.0884643	0.0264836	LTV1, RRAGA, RRAGC, RRAGB, RRAGD	5251	5	18224	3.47058	1	0.398519	0.382068
GOTERM_CC_DIRECT	GO:0005765~lysosomal membrane	95	1.68082	0.0265232	SCARB2, SLC48A1, HSP90AB1, ARRB1, ABCC10, ATRAID, RPTOR, MFSD8, ZFYVE26, LAMP3, ANKFY1, VPS35, HLA-DOB, SPG11, BORCS7, BORCS6, AP2M1, VPS39, TRIM23, SLC36A1, RAB2A, STARD3, ANXA2, SLC30A3, SPHK2, STX8, VPS33A, AP1B1, ATP11C, AP3B1, MYO7A, CYB561A3, MFSD12, TMEM175, VAMP8, RRAGA, LMBRD1, NPC1, RRAGB, DNAJC5, COL6A1, TMEM79, SPNS1, TMEM106B, TLR3, SIDT2, AHNAK, LRP1, STX17, GNAI3, ABCB9, LRP2, NAPG…	5251	274	18224	1.2033	1	0.398519	0.382068
GOTERM_CC_DIRECT	GO:0005788~endoplasmic reticulum lumen	69	1.22081	0.0270874	SPON1, COL16A1, FLT3, COL14A1, CTSZ, MYDGF, ADAMTS5, COLGALT1, SIL1, CTSC, WNT5A, P3H2, PLAUR, PDIA6, SUMF2, PDIA4, SUMF1, F5, BACE1, DNAJC3, F7, F8, COL4A1, COL6A1, DNAJB11, COL4A6, COL8A2, COL4A5, COL6A3, COL8A1, RDH5, FKBP7, GAS6, SLC27A2, CES2, CES1, COL17A1, H6PD, CLN6, HSP90B1, FOXRED2, ERLEC1, OS9, PDGFD, ESD, PDGFC, SERPINH1, ARSG, ARSD, UGGT1, EDEM3, BCHE, CRTAP, PTPRN2, SDF2L1, COL24A1,…	5251	192	18224	1.24724	1	0.40191	0.385319
GOTERM_CC_DIRECT	GO:0012506~vesicle membrane	12	0.212314	0.0289556	SLC5A6, BAIAP2L2, GIPC1, GAD1, ASPSCR1, NCK2, ATP2A2, TRAF2, GRB2, FNDC3A, SLC26A6, NCK1	5251	22	18224	1.89304	1	0.424325	0.406809
GOTERM_CC_DIRECT	GO:0005657~replication fork	10	0.176929	0.031216	PIF1, RAD51D, DNMT1, RAD51C, PCNA, UBE2B, BCL6, UHRF1, CHEK1, XRCC3	5251	17	18224	2.04152	1	0.442878	0.424596
GOTERM_CC_DIRECT	GO:0022624~proteasome accessory complex	10	0.176929	0.031216	PSMD8, PSMD12, PSMD11, PSMD14, PSMC3, PSMD13, PSMD2, PSMC2, PSMD3, PSMD1	5251	17	18224	2.04152	1	0.442878	0.424596
GOTERM_CC_DIRECT	GO:0019005~SCF ubiquitin ligase complex	22	0.389243	0.031341	FBXW4, USP47, FBXW7, CUL1, FBXL15, CKS1B, ABTB2, ABTB1, KBTBD4, BTBD3, FBXO4, CKS2, SPOP, SPOPL, FBXL3, FBXO6, FBXL2, ARIH1, SKP2, BTRC, FBXL5, SKP1	5251	50	18224	1.52705	1	0.442878	0.424596
GOTERM_CC_DIRECT	GO:0014069~postsynaptic density	66	1.16773	0.0317744	GSK3B, ARF1, BMPR2, CLSTN2, CLSTN1, ARRB1, RUSC1, GPER1, PSD3, PALM, NCS1, NPTN, VPS35, HOMER3, NEFH, RAB8A, ANKS1B, SIGMAR1, AXIN2, PJA2, ARFGAP1, DNM2, BCR, PLCB4, ITGA8, PKP4, MAPT, SOS1, NLGN1, RGS19, SRC, KLHL17, ITPR1, LRP4, CACNA1C, LRP8, CNN3, SHARPIN, SYNDIG1, RGS20, SPOCK1, SRGAP2, CAMK2G, SPTBN1, CAP2, LYN, NTRK2, NLGN4X, DMTN, SEMA4C, DTNBP1, NETO2, DCLK1, ARHGAP32, CPEB1, P2RX4, DLG2…	5251	184	18224	1.24488	1	0.44372	0.425403
GOTERM_CC_DIRECT	GO:0048471~perinuclear region of cytoplasm	201	3.55626	0.0331593	EIF4A2, APP, PATJ, TFRC, MT1M, STMN2, ZFYVE1, CDC20, PREX1, MT2A, MAP1S, SERPINF1, PRKCE, ALG2, CSNK1D, ACTN4, EML1, GTPBP4, MT1A, BTK, MT1F, MT1G, MT1H, SET, DCUN1D3, TGFA, GABARAP, MTDH, PKHD1, PRDX5, SPAST, STC2, MYO6, CMYA5, S100A13, TP53BP2, MAP6, HMOX1, APOD, TSPAN1, LYN, MAGEE1, PDE2A, XRCC3, FZD9, EIF2AK2, LNPEP, SNF8, MANF, EHD1, EHD2, TOLLIP, CALR, FBXL5, PAM, ITM2C, ARF1, MTMR14, ARHGA…	5251	621	18224	1.12333	1	0.457676	0.438783
GOTERM_CC_DIRECT	GO:0030176~integral component of endoplasmic reticulum membrane	40	0.707714	0.034126	RTN2, SLC35B2, PIGU, PIGT, RTN1, ARL6IP1, SLC35B1, DERL1, RRBP1, SGMS2, ABCB9, AUP1, HACD2, SEC61A1, UBXN8, SARAF, RCE1, XXYLT1, SLC37A4, LBR, ELOVL1, XBP1, SLC37A1, HSPA5, ELOVL5, WFS1, ELOVL2, TAP2, TAP1, ELOVL6, KTN1, EXT1, DCSTAMP, G6PC3, SPCS1, TBL2, PIGK, PREB, PIGG, SLC27A2	5251	104	18224	1.33484	1	0.465604	0.446384
GOTERM_CC_DIRECT	GO:0005761~mitochondrial ribosome	14	0.2477	0.0359097	GADD45GIP1, MRPS14, MRPS22, MRPL18, MRPS12, MRPL28, MRPL37, MRPL48, MRPL13, MRPL35, MRPL11, MRPL51, MTG1, MRPL9	5251	28	18224	1.73529	1	0.475481	0.455853
GOTERM_CC_DIRECT	GO:0030027~lamellipodium	58	1.02619	0.0359179	ITSN1, RAPH1, STMN2, DYSF, PTPRM, BRK1, CIB1, PKD2, SH3RF1, MYLK, PSTPIP1, CDH2, DPYSL3, RAC3, SH3BGRL3, ACTR3, TESC, ARAP3, TSC1, SCRIB, NRBP1, DNM2, ACTA2, PALLD, EVL, RAPGEF3, PLEKHH2, PDXP, IQGAP2, CORO1A, SLC9A1, CORO1C, FGD3, FGD4, ABLIM1, FGD5, SNX1, SNX2, ABLIM3, CTNNA1, STX3, PLCG1, SRGAP2, MYH10, VASP, CARMIL2, MYO10, SORBS2, PARVA, PARVB, PTPN13, MCC, PTK2, CCDC88A, FAP, CDK5, ABI1, MY…	5251	160	18224	1.25808	1	0.475481	0.455853
GOTERM_CC_DIRECT	GO:0009898~cytoplasmic side of plasma membrane	19	0.336164	0.0360516	G6PD, MAP2K2, DIABLO, PTEN, ASPSCR1, TRAF2, SHROOM4, GEM, CD2, IKBKB, TH, TRAF3, TRAF5, CHMP4B, PKP4, PGM5, PTPN7, PTPN4, ACP1	5251	42	18224	1.57002	1	0.475481	0.455853
GOTERM_CC_DIRECT	GO:0005742~mitochondrial outer membrane translocase complex	7	0.12385	0.0391049	TOMM70, PINK1, TOMM40, TOMM7, TOMM5, TOMM22, TOMM6	5251	10	18224	2.4294	1	0.507384	0.486439
GOTERM_CC_DIRECT	GO:0000176~nuclear exosome (RNase complex)	9	0.159236	0.0397529	EXOSC5, EXOSC4, DIS3, EXOSC9, DIS3L, EXOSC3, EXOSC2, EXOSC1, MPHOSPH6	5251	15	18224	2.08235	1	0.507384	0.486439
GOTERM_CC_DIRECT	GO:0016514~SWI/SNF complex	9	0.159236	0.0397529	RB1, SMARCE1, SMARCD2, SMARCB1, SMARCC2, SMARCD3, ACTL6A, SMARCA2, SMARCA4	5251	15	18224	2.08235	1	0.507384	0.486439
GOTERM_CC_DIRECT	GO:0043234~protein complex	136	2.40623	0.0421785	PATJ, SMARCB1, KDM1A, UBE2D2, NR3C1, ACTB, IPO4, DCAF7, CDC20, SCP2, MYC, DPYSL2, CAPN3, CEP250, NEK2, GLUL, BORCS7, BORCS6, CDK5RAP3, TP63, MEN1, MEF2C, PRKCI, SMARCC2, FBXW7, TSC1, MITF, ACTN4, BCR, AR, RBP4, ORAI1, UBE2V1, PEX11G, ASF1B, PXK, SET, PEX11A, STXBP1, PEX11B, ITPR1, CDCA8, STK4, HIGD1A, CORO1A, STK3, STIP1, SNX1, KLC2, SNX2, CD19, EIF4EBP1, SPTBN1, FIS1, SMAD1, DTNA, CAV2, CAV1, ER…	5251	412	18224	1.14563	1	0.532616	0.510629
GOTERM_CC_DIRECT	GO:0005637~nuclear inner membrane	19	0.336164	0.0457526	SMAD1, CBX3, SIGMAR1, NRM, ITPR1, NUTF2, SIRT1, TOR1AIP1, LRPPRC, LMNB2, LMNB1, TMEM201, NEMP2, IFI27, UNC50, NEMP1, EMD, TMPO, KCNH1	5251	43	18224	1.53351	1	0.571667	0.548068
GOTERM_CC_DIRECT	GO:0017053~transcriptional repressor complex	23	0.406936	0.0488945	SMARCE1, AKIRIN2, JUN, SMARCC2, CBX5, LIN37, PHF12, ZBTB16, ARID4A, ELP2, LIN9, N4BP2L2, GLI3, SKI, NCOR1, SIN3A, MIER1, HDGF, RCOR3, RCOR2, ZNF224, ELANE, JAZF1	5251	55	18224	1.45133	1	0.589316	0.564988
GOTERM_CC_DIRECT	GO:0005641~nuclear envelope lumen	6	0.106157	0.049151	BCHE, APP, TUBB, CACYBP, SORL1, IGF2R	5251	8	18224	2.60293	1	0.589316	0.564988
GOTERM_CC_DIRECT	GO:0033018~sarcoplasmic reticulum lumen	6	0.106157	0.049151	HRC, CALU, CASQ2, CALR, CASQ1, SRL	5251	8	18224	2.60293	1	0.589316	0.564988
GOTERM_CC_DIRECT	GO:0030991~intraciliary transport particle A	6	0.106157	0.049151	IFT43, IFT140, WDR19, TTC21A, TULP3, WDR35	5251	8	18224	2.60293	1	0.589316	0.564988
GOTERM_CC_DIRECT	GO:0000177~cytoplasmic exosome (RNase complex)	8	0.141543	0.0508548	EXOSC5, CARHSP1, EXOSC4, DIS3, EXOSC9, DIS3L, EXOSC3, EXOSC2	5251	13	18224	2.13574	1	0.594673	0.570125
GOTERM_CC_DIRECT	GO:0005750~mitochondrial respiratory chain complex III	8	0.141543	0.0508548	UQCRB, UQCRQ, UQCRFS1, CYC1, UQCRC2, BCS1L, UQCRHL, UQCRH	5251	13	18224	2.13574	1	0.594673	0.570125
GOTERM_CC_DIRECT	GO:0005814~centriole	42	0.7431	0.0511008	TOP2A, CEP104, CEP120, CCDC146, CAPG, WDR62, NUBP1, AURKA, CEP128, PCM1, POC1A, CEP250, CCDC92, PCNT, CFAP20, BBS4, RAB8A, CEP55, LRRCC1, PLK4, IQCB1, STIL, PARP3, CEP135, PLK2, CEP152, SCLT1, KIF24, TUBG1, CCSAP, IFT20, AHI1, MPHOSPH9, IFT88, POC5, CENPJ, CROCC, AGBL2, SASS6, BIRC5, CEP63, CEP89	5251	113	18224	1.28995	1	0.594673	0.570125
GOTERM_CC_DIRECT	GO:0031307~integral component of mitochondrial outer membrane	11	0.194621	0.0524691	ARMCX3, FIS1, PINK1, CPT1A, TOMM40, RHOT1, ABCB6, TOMM7, BAK1, MGARP, TOMM22	5251	21	18224	1.81792	1	0.604668	0.579707
GOTERM_CC_DIRECT	GO:0005929~cilium	54	0.955414	0.0541327	INVS, PKD2, KIF17, GLI3, NUBP1, CDK20, CEP250, BBS9, SPA17, BBS4, RAB8A, TTC21A, CCSAP, WDR35, TMEM80, IFT88, PKM, EVC, IFT43, RILPL2, TMEM138, TMEM218, IFT46, CFAP53, CEP104, DNAH7, ARL3, TULP3, ADCY6, AURKA, DYNC2LI1, PKHD1, IFT74, ANKMY2, NPHP3, CFAP20, ATP6V1D, DNAH12, CAV1, CFAP70, WDR19, DNAH14, MOK, LCA5, DCDC2, TUBB4A, IFT20, TTLL7, AHI1, TTC8, TTLL4, TTC30B, TTC30A, CLUAP1	5251	151	18224	1.24113	1	0.615017	0.589628
GOTERM_CC_DIRECT	GO:0005789~endoplasmic reticulum membrane	271	4.79476	0.0544033	FAAH, AHCYL1, ARL6IP1, PITPNB, ANTXR2, CYP4Z1, NSDHL, GJA1, CREB3L4, ARL6IP5, PIEZO1, PTGFRN, WLS, MFSD2A, TMPO, SEC63, IL15RA, NUP210, ALG6, RSAD2, ALG2, ALG3, MOGS, ATG14, TMEM170A, CH25H, POR, CYP2U1, ZW10, TYRO3, TRIM13, KDELR2, PREB, FAR2, RPN2, LMAN2L, ABCB6, FAXDC2, RPN1, HPN, TMTC2, MGST2, TGFA, HACD2, MTDH, CYB5R1, PTDSS1, SPAST, CYP4X1, FLRT2, POM121C, FLRT3, RDH10, RDH16, MLEC, HMOX1, …	5251	862	18224	1.0911	1	0.615017	0.589628
GOTERM_CC_DIRECT	GO:0043025~neuronal cell body	105	1.85775	0.0560818	NCF1, EIF4A3, STMN2, CIB1, ELK1, PYCARD, C4B, C4A, ALCAM, TUBB3, DPYSL2, EPHB2, KCNH1, AGFG1, MAP1S, CYBA, HCFC1, OLFM1, IL6ST, RTN4R, SPTBN4, PDE1B, PDE1A, HPN, KLHL17, LPAR1, SLC1A3, ITPR3, CPLX1, CNN3, TRPM2, GRK4, PENK, SLC38A7, APOD, APOE, TAC1, MYH10, TRPM4, SPTBN2, SRD5A1, TGFB3, SIAH2, PMM2, LSM1, MYO5A, MAGOHB, CDK5, CPE, STRN, IGSF9B, BMPR1B, ADA, GSK3B, NRP1, BMPR2, NUMA1, DENND1A, RPT…	5251	315	18224	1.15686	1	0.62801	0.602085
GOTERM_CC_DIRECT	GO:0005876~spindle microtubule	19	0.336164	0.0571795	SPAG5, NUMA1, ARL3, PLK1, CSNK1D, TUBG2, KIF11, AURKB, AURKA, SKA2, NEIL2, NCOR1, PSRC1, KIF2A, PRC1, KIF4A, NUSAP1, CDK1, BIRC5	5251	44	18224	1.49866	1	0.628446	0.602503
GOTERM_CC_DIRECT	GO:0045171~intercellular bridge	19	0.336164	0.0571795	ZBTB18, ESRRA, IQCB1, PRKCI, CEP131, CDCA8, SRA1, USB1, KIF23, CDC7, AURKB, LYRM1, SIN3A, RAB35, QSOX1, CD34, CEP55, TRIM45, RBM44	5251	44	18224	1.49866	1	0.628446	0.602503
GOTERM_CC_DIRECT	GO:0032154~cleavage furrow	20	0.353857	0.057994	PLK4, RALA, PLEKHG6, PDXP, MASTL, RAB11A, RHOB, MYLK, LIMA1, PSTPIP1, PITPNM1, RACGAP1, SPIRE2, PKN1, STAMBP, PLCD3, ECT2, MYH10, CEP55, MEN1	5251	47	18224	1.47684	1	0.63155	0.605479
GOTERM_CC_DIRECT	GO:0005793~endoplasmic reticulum-Golgi intermediate compartment	27	0.477707	0.0591099	TMED10, LMAN2L, STX17, MYDGF, CA4, SERPINH1, TRAPPC12, UGGT1, SCYL1, TMED9, HSPA5, SLC35C2, SURF4, DDHD2, DICER1, RGMB, PDIA6, YIF1A, YIF1B, SEC23IP, STK17B, P4HB, MPPE1, ERGIC1, PTPN2, CNIH4, NUCB2	5251	68	18224	1.37802	1	0.632103	0.606009
GOTERM_CC_DIRECT	GO:0031234~extrinsic component of cytoplasmic side of plasma membrane	27	0.477707	0.0591099	ITK, SRC, ATP2A2, RACGAP1, CSK, CYTH1, SNX5, JAK1, LYN, CARMIL2, YES1, DTNA, SYK, KCNIP1, CAV2, TNK1, KCNAB1, PTK2, ZAP70, FES, DLG4, LCK, BTK, ESYT3, KRAS, FERMT2, CDK16	5251	68	18224	1.37802	1	0.632103	0.606009
GOTERM_CC_DIRECT	GO:0071682~endocytic vesicle lumen	9	0.159236	0.0598772	HPX, HSP90AA1, HSPH1, HBB, HBA2, HYOU1, CALR, APOE, HSP90B1	5251	16	18224	1.9522	1	0.634591	0.608395
GOTERM_CC_DIRECT	GO:0005828~kinetochore microtubule	5	0.0884643	0.0613776	KIF18A, ZW10, KNTC1, RAB11A, CLASP2	5251	6	18224	2.89215	1	0.639081	0.612699
GOTERM_CC_DIRECT	GO:0005663~DNA replication factor C complex	5	0.0884643	0.0613776	RFC5, RFC3, RFC4, PCNA, RFC2	5251	6	18224	2.89215	1	0.639081	0.612699
GOTERM_CC_DIRECT	GO:0030686~90S preribosome	7	0.12385	0.0654306	RSL1D1, NOP14, CMSS1, BMS1, HEATR1, RRP36, WDR46	5251	11	18224	2.20855	1	0.669535	0.641896
GOTERM_CC_DIRECT	GO:0034663~endoplasmic reticulum chaperone complex	7	0.12385	0.0654306	SDF2L1, HSPA5, DNAJB11, HYOU1, P4HB, PDIA6, HSP90B1	5251	11	18224	2.20855	1	0.669535	0.641896
GOTERM_CC_DIRECT	GO:0072372~primary cilium	30	0.530786	0.0678449	UNC119B, ARL3, TULP3, EFCAB7, KIF17, GLI3, PKHD1, DYNC2LI1, IFT74, NPHP3, KIF3C, TNPO1, SPA17, RAB8A, DYNC2H1, IFT140, CSNK1A1, WDR19, DCDC2, WDR35, DYNLL2, IFT20, AHI1, IFT88, IFT43, TTC30B, RILPL2, DYNLRB2, IFT46, CLUAP1	5251	78	18224	1.33484	1	0.688307	0.659893
GOTERM_CC_DIRECT	GO:0042645~mitochondrial nucleoid	19	0.336164	0.0704421	LRRC59, ACADVL, SHMT2, UQCC2, FASTKD2, SOD2, ATAD3A, LRPPRC, SUPV3L1, CPS1, DNAJA3, TOP1MT, LONP1, VDAC2, VDAC1, DNA2, SSBP1, SLC25A5, POLG	5251	45	18224	1.46535	1	0.706059	0.676913
GOTERM_CC_DIRECT	GO:0031901~early endosome membrane	42	0.7431	0.074532	VAC14, SH3GL3, RAB5B, LDLRAD4, MTMR4, TMEM165, ZFYVE28, LAMP5, SNX1, SNX2, SYNDIG1, PMEPA1, FCGR1A, EPS15, SNX8, APPL2, SNX5, RAB11FIP5, WLS, KCNH1, SH3GL1, TICAM2, MMGT1, CAV1, RCC2, HLA-B, SNX21, STAM, KREMEN2, HLA-F, HLA-G, CLIP3, VAMP8, RUFY1, EHD1, ZFYVE16, SNX19, HGS, KIF16B, JMJD7-PLA2G4B, STAM2, TMEM9B	5251	116	18224	1.25659	1	0.706059	0.676913
GOTERM_CC_DIRECT	GO:0071953~elastic fiber	4	0.0707714	0.0749481	MFAP4, ELN, FBLN1, FBLN5	5251	4	18224	3.47058	1	0.706059	0.676913
GOTERM_CC_DIRECT	GO:0000942~condensed nuclear chromosome outer kinetochore	4	0.0707714	0.0749481	CCNB1, PLK1, BUB1, NDC80	5251	4	18224	3.47058	1	0.706059	0.676913
GOTERM_CC_DIRECT	GO:0072589~box H/ACA scaRNP complex	4	0.0707714	0.0749481	DKC1, GAR1, NHP2, NOP10	5251	4	18224	3.47058	1	0.706059	0.676913
GOTERM_CC_DIRECT	GO:0031429~box H/ACA snoRNP complex	4	0.0707714	0.0749481	DKC1, GAR1, NHP2, NOP10	5251	4	18224	3.47058	1	0.706059	0.676913
GOTERM_CC_DIRECT	GO:1990131~Gtr1-Gtr2 GTPase complex	4	0.0707714	0.0749481	RRAGA, RRAGC, RRAGB, RRAGD	5251	4	18224	3.47058	1	0.706059	0.676913
GOTERM_CC_DIRECT	GO:0090661~box H/ACA telomerase RNP complex	4	0.0707714	0.0749481	DKC1, GAR1, NHP2, NOP10	5251	4	18224	3.47058	1	0.706059	0.676913
GOTERM_CC_DIRECT	GO:0001652~granular component	4	0.0707714	0.0749481	FBL, CLEC3B, SURF6, CDKN2AIP	5251	4	18224	3.47058	1	0.706059	0.676913
GOTERM_CC_DIRECT	GO:0071565~nBAF complex	8	0.141543	0.0770286	SMARCE1, SMARCB1, SMARCC2, SMARCD3, SS18L1, DPF1, SMARCA2, SMARCA4	5251	14	18224	1.98319	1	0.719944	0.690224
GOTERM_CC_DIRECT	GO:0005667~transcription factor complex	66	1.16773	0.0789546	KDM1A, SIX1, LDB2, HOXA10, DMBX1, DACH1, SOX17, SIN3A, JUNB, PITX1, TEAD2, TP63, ABT1, MEF2A, HES6, NCOA6, LMO4, TCF12, LMO2, FOS, MED27, POU5F1, MED7, ZEB1, RBL1, TFDP1, TFDP2, SUB1, ATF5, YAP1, BEX1, PRKDC, EPAS1, LEF1, GATA3, NPAS2, PDLIM1, DEAF1, GSC, E2F2, E2F3, E2F4, MTA2, NKX2-5, E2F5, E2F7, E2F8, ARNT2, SMAD1, JUN, XRCC6, EYA3, HMGA1, PBX3, SNF8, WTIP, TBX2, SKI, MLXIPL, MEIS1, CDK4, CDK2…	5251	193	18224	1.18683	1	0.725956	0.695988
GOTERM_CC_DIRECT	GO:0031410~cytoplasmic vesicle	79	1.39774	0.0790079	USP6NL, NRP1, CHIC1, TFRC, ARRB1, DUSP16, FYCO1, HERC3, ATP7B, MAP1LC3A, GRM4, RUSC1, ARHGDIB, HYAL3, PALM, SPG11, SYBU, AGFG1, WLS, PDGFRB, IL15RA, GBP5, GABARAPL2, DST, MYOF, SIGMAR1, ATG9A, COMMD7, BACE1, TRAF7, VGF, TBC1D7, ADGRF5, BTK, ORAI1, RIN3, ANG, RHCG, DSC2, VAMP2, MAPKAP1, OPRL1, TGFA, SNX33, DLL1, GABARAP, NKD2, IFT74, EBP, PRDX5, DPP7, SPAST, SOCS1, TP53INP1, MYO6, ESD, UBQLN1, TBC…	5251	235	18224	1.1667	1	0.725956	0.695988
GOTERM_CC_DIRECT	GO:0031941~filamentous actin	14	0.2477	0.0814173	TPM1, ESPN, IQGAP2, PKD2, SHROOM4, MYO1C, TMSB15A, TMSB15B, MYO6, DPYSL3, FLNA, RAC3, TMSB10, FERMT2	5251	31	18224	1.56736	1	0.725956	0.695988
GOTERM_CC_DIRECT	GO:0016605~PML body	36	0.636943	0.0824085	RB1, RPAIN, SPTBN4, BLM, SP140, PTEN, PARK7, TRIM8, RDM1, CHEK2, SUMO3, TDG, TP53INP1, HSF1, MKNK2, TOPBP1, IKBKE, UBE2I, CBX5, ZBTB16, NSMCE2, ATRX, TOP3A, SIRT1, PATL1, PIAS2, CHFR, PIAS1, KLHL20, ISG20, SKI, RAD51, ELF4, RFWD3, SRSF2, EIF3E	5251	98	18224	1.27491	1	0.725956	0.695988
GOTERM_CC_DIRECT	GO:0001772~immunological synapse	15	0.265393	0.08308	CD53, STOML2, CARMIL2, DUSP3, GZMB, CD3E, SCIMP, CORO1A, ZAP70, ALCAM, CD6, LCK, ARHGDIA, PRKCQ, CARD11	5251	34	18224	1.53114	1	0.725956	0.695988
GOTERM_CC_DIRECT	GO:0033116~endoplasmic reticulum-Golgi intermediate compartment membrane	25	0.442321	0.0830843	TMED10, STX17, GOSR2, CTSZ, TGFA, LAMP5, PIEZO1, CTSC, BCAP31, RAB2A, TMED9, SLC35C2, SURF4, ASPSCR1, COPZ2, AZIN2, CSNK1D, F5, DCSTAMP, F8, VMA21, GORASP1, MPPE1, CNIH2, ERGIC1	5251	64	18224	1.35569	1	0.725956	0.695988
GOTERM_CC_DIRECT	GO:0009897~external side of plasma membrane	72	1.27389	0.0834816	CD86, CXCL9, CD40, TFRC, CD80, CLEC14A, FASLG, TNFRSF13C, CTSV, CD3E, ANTXR2, TNF, SERPINA5, CDH5, IGHG1, ALCAM, ITGAX, FCER1A, CTLA4, CCR7, ITGAV, CD36, SPA17, CD34, LAG3, ITGA3, HEG1, ATP6AP2, GFRA3, TGFBR2, TGFBR3, BCAM, EMCN, IFNG, CD8A, RTN4RL1, SCNN1B, MS4A2, IL6ST, ASTN1, ENG, SEMA7A, NLGN1, IL2RG, ENOX2, SCUBE1, CXCR3, CD19, S1PR1, TNFRSF14, GPC4, ICOS, LDLR, GPIHBP1, SLAMF1, CD276, P2RY1…	5251	213	18224	1.17315	1	0.725956	0.695988
GOTERM_CC_DIRECT	GO:0005832~chaperonin-containing T-complex	6	0.106157	0.0848147	CCT3, CCT6A, CCT2, CCT7, CCT5, CCT6B	5251	9	18224	2.31372	1	0.725956	0.695988
GOTERM_CC_DIRECT	GO:0072687~meiotic spindle	6	0.106157	0.0848147	TUBB8, ASPM, RSPH1, BORA, HSPA2, AURKA	5251	9	18224	2.31372	1	0.725956	0.695988
GOTERM_CC_DIRECT	GO:0034464~BBSome	6	0.106157	0.0848147	BBS2, BBS1, TTC8, BBS9, BBS5, BBS4	5251	9	18224	2.31372	1	0.725956	0.695988
GOTERM_CC_DIRECT	GO:0031095~platelet dense tubular network membrane	6	0.106157	0.0848147	EHD1, DMTN, ITPR1, ATP2A2, ITPR2, ITPR3	5251	9	18224	2.31372	1	0.725956	0.695988
GOTERM_CC_DIRECT	GO:0030532~small nuclear ribonucleoprotein complex	9	0.159236	0.0853538	ARFGEF1, SF3B3, SNRPD2, SNRPD1, SNRPG, SNRPA1, SNRPF, SLU7, SNRPB	5251	17	18224	1.83736	1	0.725956	0.695988
GOTERM_CC_DIRECT	GO:0005782~peroxisomal matrix	19	0.336164	0.0856224	ACOT8, ABCD3, ECI2, HSD17B4, IDE, DDO, HSPD1, PRDX5, SCP2, ACOX2, ACOX1, CAT, NUDT19, HACL1, FAR2, ACAA1, CRAT, ACOT4, NUDT12	5251	46	18224	1.4335	1	0.725956	0.695988
GOTERM_CC_DIRECT	GO:0030141~secretory granule	28	0.4954	0.0932069	HILPDA, PLAT, CTSV, PCSK5, HSPD1, FSTL3, PCSK1N, CTSG, ATP7A, ELANE, RAB11FIP5, CPA3, TGFB3, RAB27B, CYBA, SYTL4, VEGFA, COL1A1, GAL, SYPL1, TFF3, CPE, AVP, SCG2, STX1A, VAMP2, LTF, VAMP3	5251	74	18224	1.31319	1	0.784657	0.752265
GOTERM_CC_DIRECT	GO:0000123~histone acetyltransferase complex	11	0.194621	0.0956774	CREBBP, KANSL2, TRRAP, KANSL3, WDR5, JADE1, ELP2, KAT8, ELP3, JADE2, HCFC1	5251	23	18224	1.65984	1	0.799782	0.766767
GOTERM_CC_DIRECT	GO:0031982~vesicle	45	0.796178	0.0985912	RAB3C, DYNC1I2, STX12, AHNAK, KCNC2, GDI2, STMN2, CIB1, NOD2, CORO1C, CST3, TUBA1C, MUC1, SNX1, DPP7, IBSP, LAMP3, ALDH3B1, TSPAN4, STOM, KCNN4, TSPAN1, SYBU, RAB4A, ANXA2, RIPK2, STX8, MYO5A, CASK, MSN, MIF, RAB11A, VAMP8, F7, PKM, VAPA, SPNS1, CHMP4B, TAGLN2, TKT, GPRC5C, GAPDH, SLC26A6, CAPS, VAMP2	5251	128	18224	1.22012	1	0.800406	0.767365
GOTERM_CC_DIRECT	GO:0071782~endoplasmic reticulum tubular network	7	0.12385	0.0997979	REEP1, SPAST, REEP5, ATL3, ATL1, RAB18, RAB3GAP1	5251	12	18224	2.0245	1	0.800406	0.767365
GOTERM_CC_DIRECT	GO:0042641~actomyosin	7	0.12385	0.0997979	MYO5A, CDC42BPB, CDC42BPA, LURAP1, MYH10, STX1A, DBN1	5251	12	18224	2.0245	1	0.800406	0.767365
GOTERM_CC_DIRECT	GO:0071564~npBAF complex	7	0.12385	0.0997979	SMARCE1, SMARCB1, SMARCC2, SMARCD3, ACTL6A, SMARCA2, SMARCA4	5251	12	18224	2.0245	1	0.800406	0.767365
GOTERM_CC_DIRECT	GO:0005885~Arp2/3 protein complex	7	0.12385	0.0997979	ACTR3, ACTR2, ARPC2, ARPC1B, ARPC1A, ARPC5L, ACTR3B	5251	12	18224	2.0245	1	0.800406	0.767365
GOTERM_CC_DIRECT	GO:0034709~methylosome	7	0.12385	0.0997979	SNRPD2, SNRPD1, PRMT1, SNRPG, SNRPF, SNRPB, WDR77	5251	12	18224	2.0245	1	0.800406	0.767365
